# Supplementary material for: The Botanical Drug PBI-05204, a Supercritical CO2 Extract of Nerium Oleander, Is Synergistic With Radiotherapy in Models of Human Glioblastoma
Source: PubMed Central journal article supplement (PMC8984197; doi:10.3389/fphar.2022.852941), 2022-03-23
Supplement: Presentation1.pdf [file Presentation1.pdf]

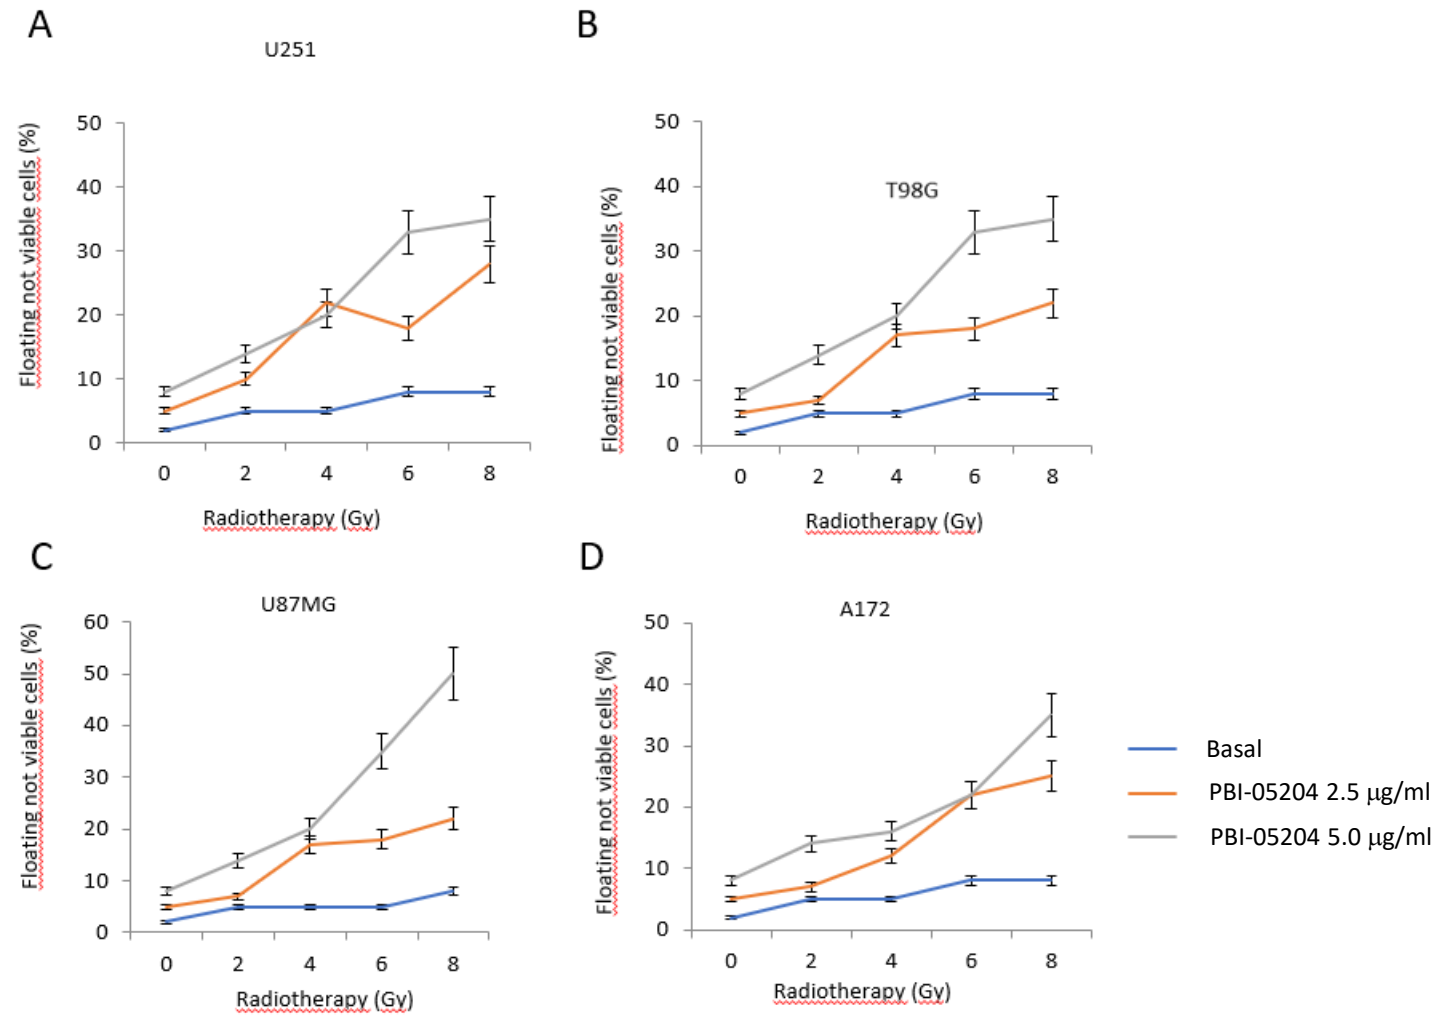

Figure S1. Increased number of non-viable floating cells following treatment with PBI-05204 plus RT in GBM cells.

A

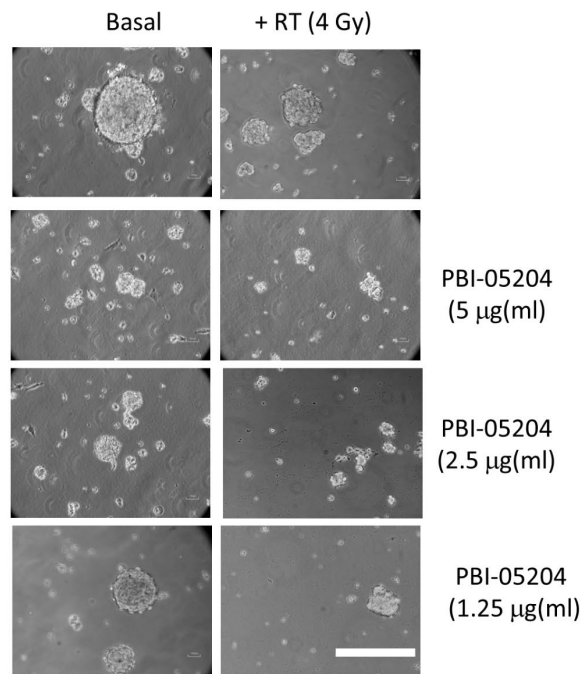

B

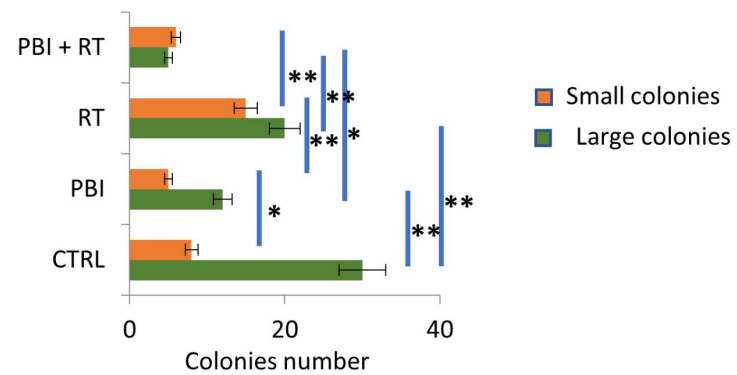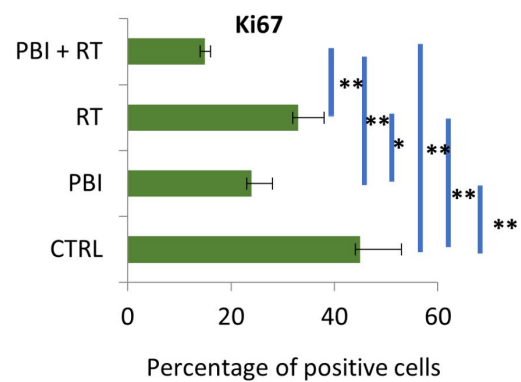

D

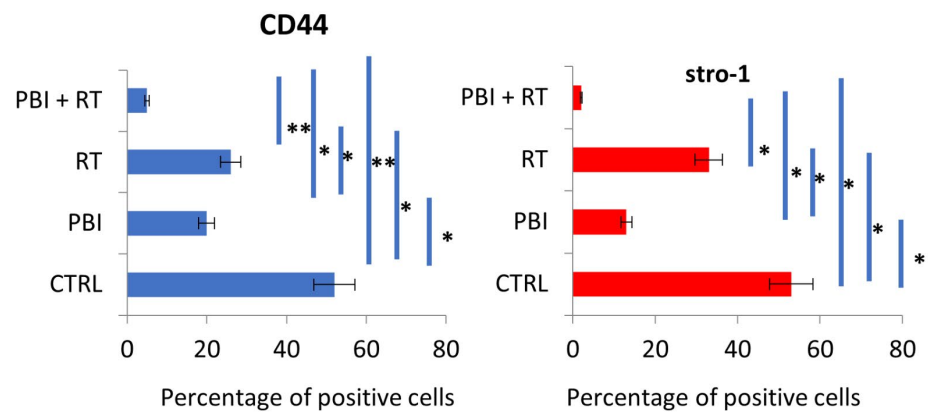

C

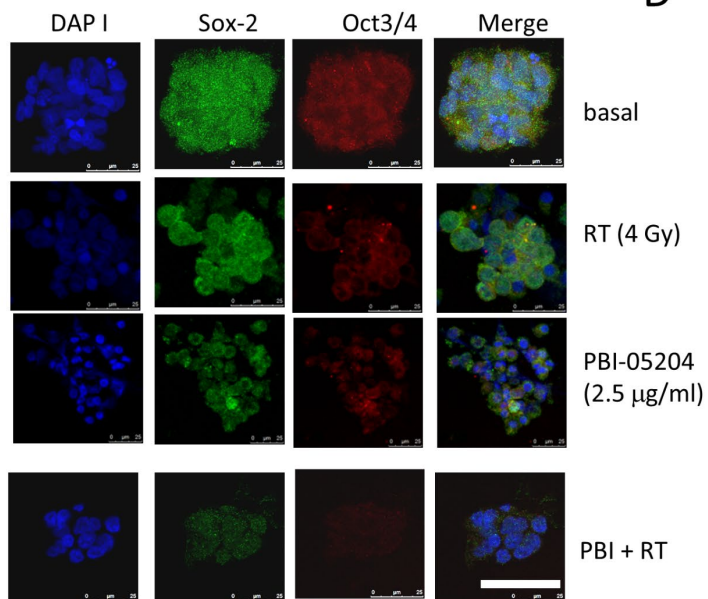

Figure S2

Figure S2. PBI-05204 enhanced RT mediated suppression of cell proliferation and stemness in U87MG cells. U87MG spheroids were cultured for 3 weeks after administration of 1.25, 2.5 or 5.0  $\mu\text{g/ml}$  PBI-05204 alone or after a single dose of RT (4 Gy) administered two days after PBI-05204 treatment. (A) Morphologic appearance of U87MG cells grown as neurosphere. Bar (1 cm) correspond to 500  $\mu\text{m}$ . (B) Count of small (< 20 cells) and large (>20 cells) colonies at 5X magnification (Top). FACS analyses of Ki67 expression in acutase<sup>TM</sup> treated single cell suspensions (Bottom, n = 3). Data are represented as mean  $\pm$  SD. \* $p < 0.05$ , \*\*  $p < 0.01$ . (C) Confocal analysis of expression of stem cells markers SOX2 and Oct3/4 after the cells were treated with control, RT only, PBI-05204 (2.5  $\mu\text{g/ml}$ ) and combination of RT and PBI-05204 for 96 hrs. Bar represents 25  $\mu\text{m}$ . (D) The FACS analysis of stro1 and CD44 levels in U87MG cells. Data are presented as mean  $\pm$  SE of three separate experiments. \* $p < 0.05$ , \*\*  $p < 0.01$ .

Table S1: Summary of comet assay results analyzed by CaspLab software

| U87MG          |                             |                    |                                                |
|----------------|-----------------------------|--------------------|------------------------------------------------|
| Condition      | DNA Damage (% DNA in tails) | Tail length (μm)   | Total DNA damage (tail moment arbitrary units) |
| CTRL           | 4.0 ± 0.5                   | 6.8 ± 0.5          | 2.5 ± 0.2                                      |
| RT 1 hr        | 15.5 ± 5.8*                 | 20.0 ± 2.0*        | 12.8 ± 4.2*                                    |
| PBI-05204 1 hr | 5.3 ± 3.8                   | 15.3 ± 1.5*        | 5.8 ± 3.0                                      |
| RT + PBI 1hr   | 35.5 ± 5.5*                 | 45.5 ± 2.3*        | 35.4 ± 7.8*                                    |
| RT 18 hr       | 28.0 ± 6.0*                 | 53.5 ± 5.5*,a      | 38.5 ± 4.2*, a                                 |
| RT + PBI 18 hr | 48.0 ± 6.5*, b, **          | 73.5 ± 10.3*, b.** | 55.6 ± 5.8 *                                   |
| U251           |                             |                    |                                                |
| CTRL           | 4.0 ± 0.2                   | 3.0 ± 0.5          | 2.5 ± 0.4                                      |
| RT 1 hr        | 9.7 ± 3.0                   | 17.8 ± 2.8*        | 8.9 ± 2.7*                                     |
| PBI-05204 1 hr | 12.7 ± 0.8*                 | 22.5 ± 6*          | 5.0 ± 3.5                                      |
| RT + PBI 1hr   | 29.0 ± 6.3*                 | 40.9 ± 3.5*        | 29.7 ± 8*,α                                    |
| RT 18 hr       | 19.7.0 ± 5.3*               | 37.0 ± 8.5*        | 33.57± 5.6*                                    |
| RT + PBI 18 hr | 52.0 ± 8.7*                 | 58.6 ± 8.6*        | 60.3 ± 6.4*,b, c                               |

\*p<0.01 vs CTRL, <sup>a</sup>p<0.01 vs PBI or RT alone; <sup>b</sup> p<0.01 vs RT 18 hr, <sup>c</sup> p<0.01 vs RT + PBI 1 hr

A

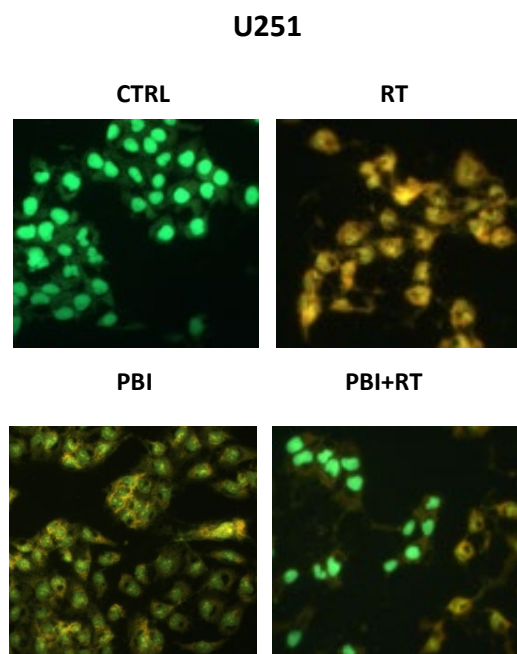

B

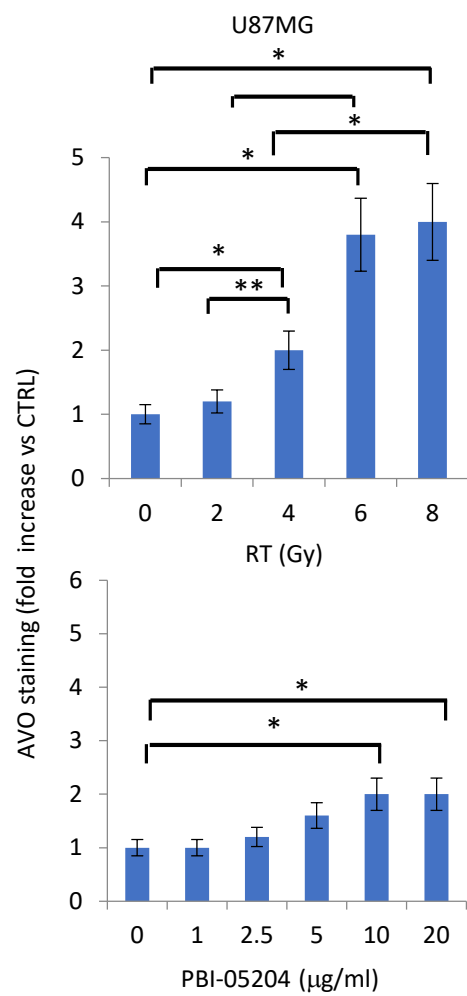

C

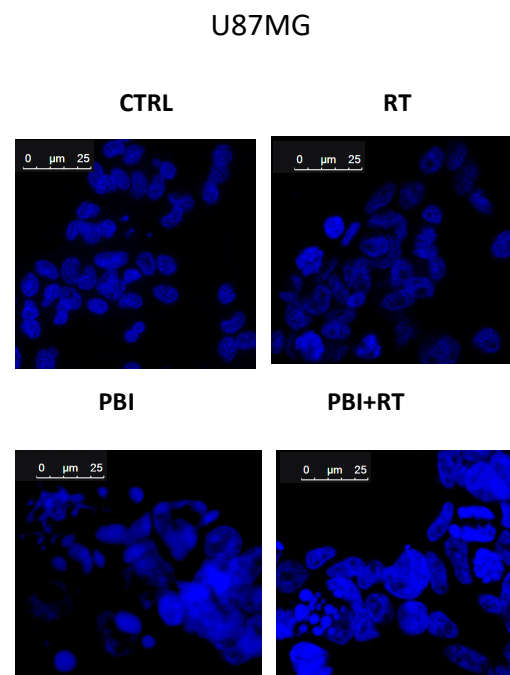

D

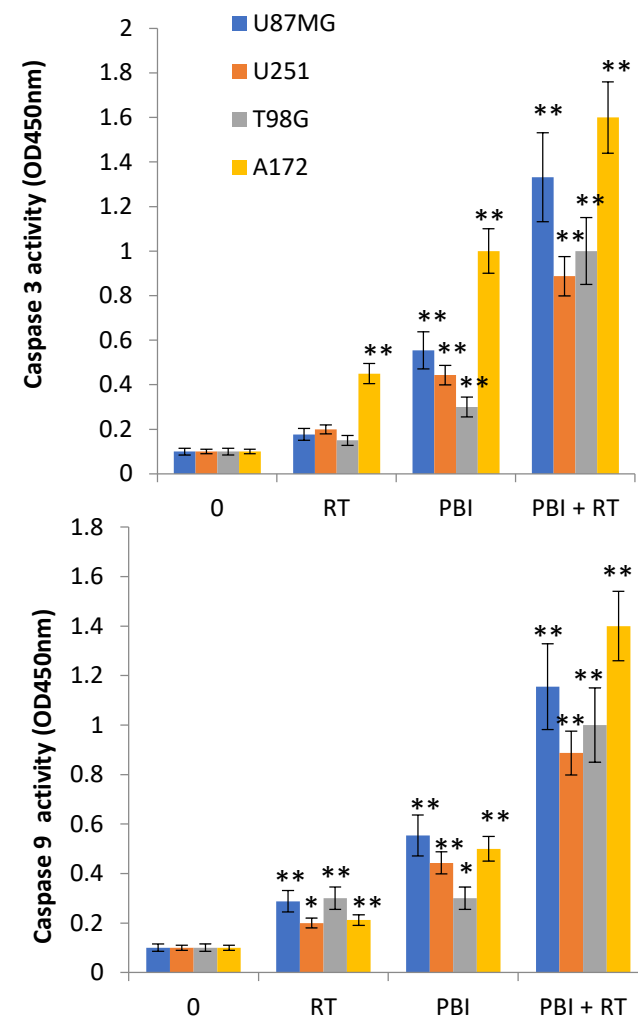

E

U87MG

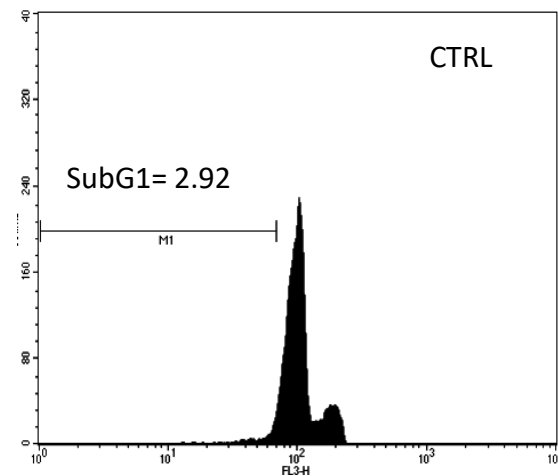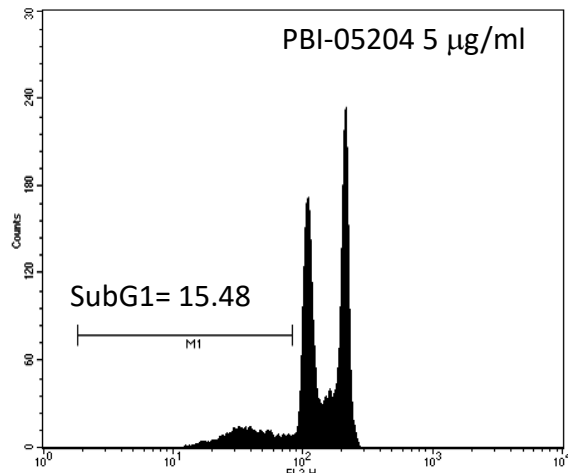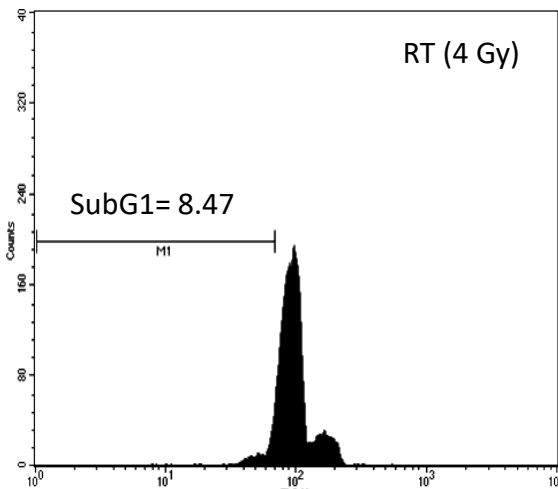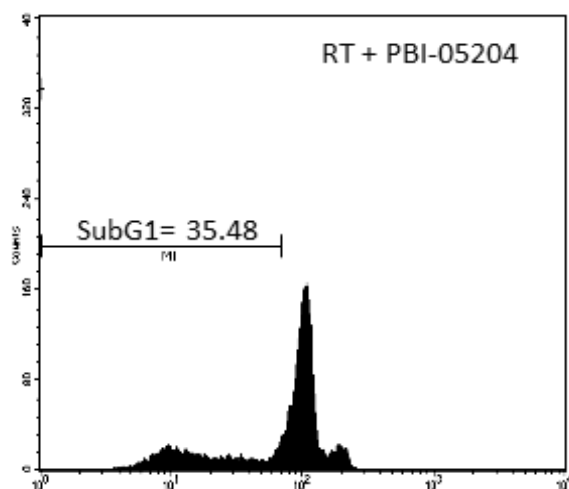

T98G

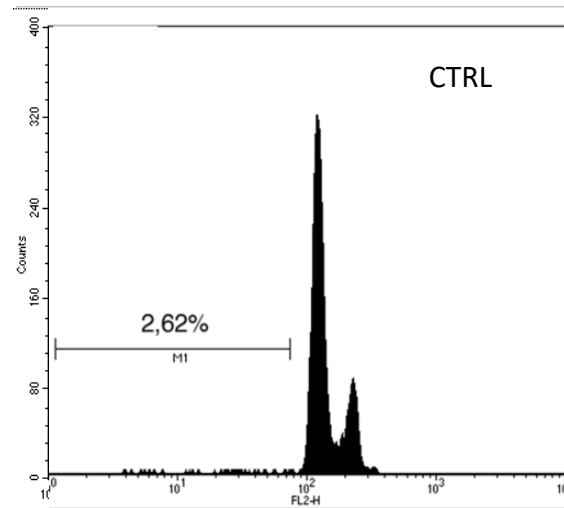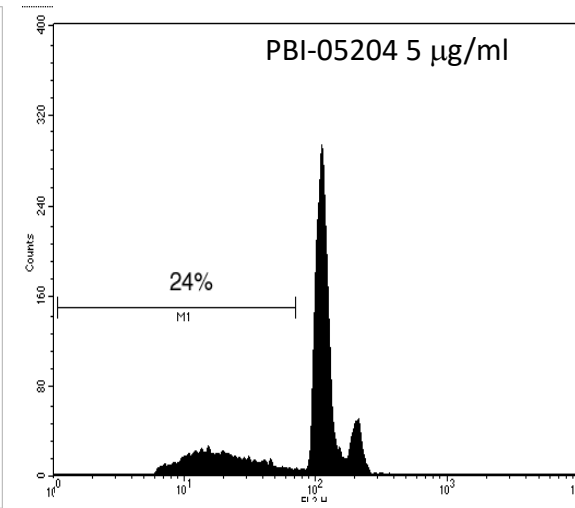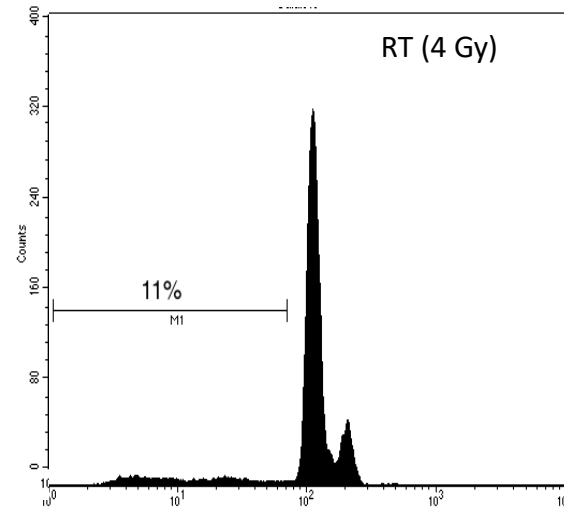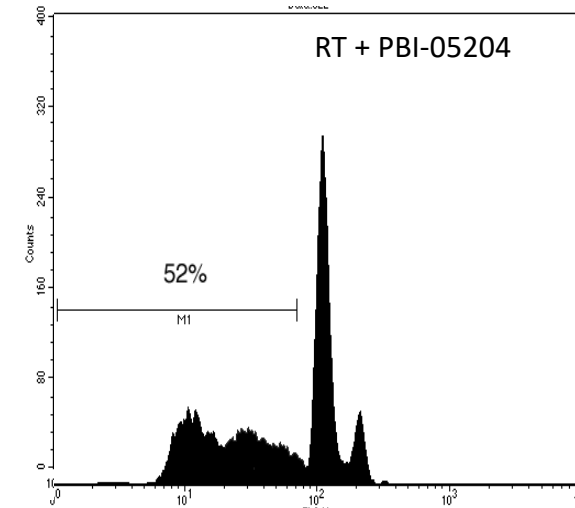

**Figure S3.** Combination of PBI-05204 and radiotherapy leads to apoptotic cell death in GBM cells.

(A) Representative image of AVO staining performed in U251 cell line treated with RT, PBI-05204 and RT plus PBI-05204. (B) Quantitation of Acridine Orange Staining (AVO) performed in U87MG cells treated with different doses of RT (0-6 Gy) and PBI-05204 (1-20  $\mu\text{g}/\text{ml}$ ). AVO accumulation was measured by the fold increase/decrease vs CTRL and data are presented as mean  $\pm$  SE from three experiments. \*  $p < 0.01$ , \*\* $p < 0.05$ . (C) Apoptotic cell death in U251 cells was confirmed by Hoechst 3324 staining ( $n = 3$  separate experiments). (D) Enzymatic caspase 3 and caspase 8 activation in GBM cells after treatment with RT, PBI-05204 and RT + PBI-05204 for 24 hr ( $n = 3$  separate experiments). Data are shown as mean  $\pm$  SE. \*\* $p < 0.01$ . (E) Cell cycle analysis of U87MG and T98G cells treated with RT, PBI-05204 and RT plus PBI-05204 for 24 hrs.

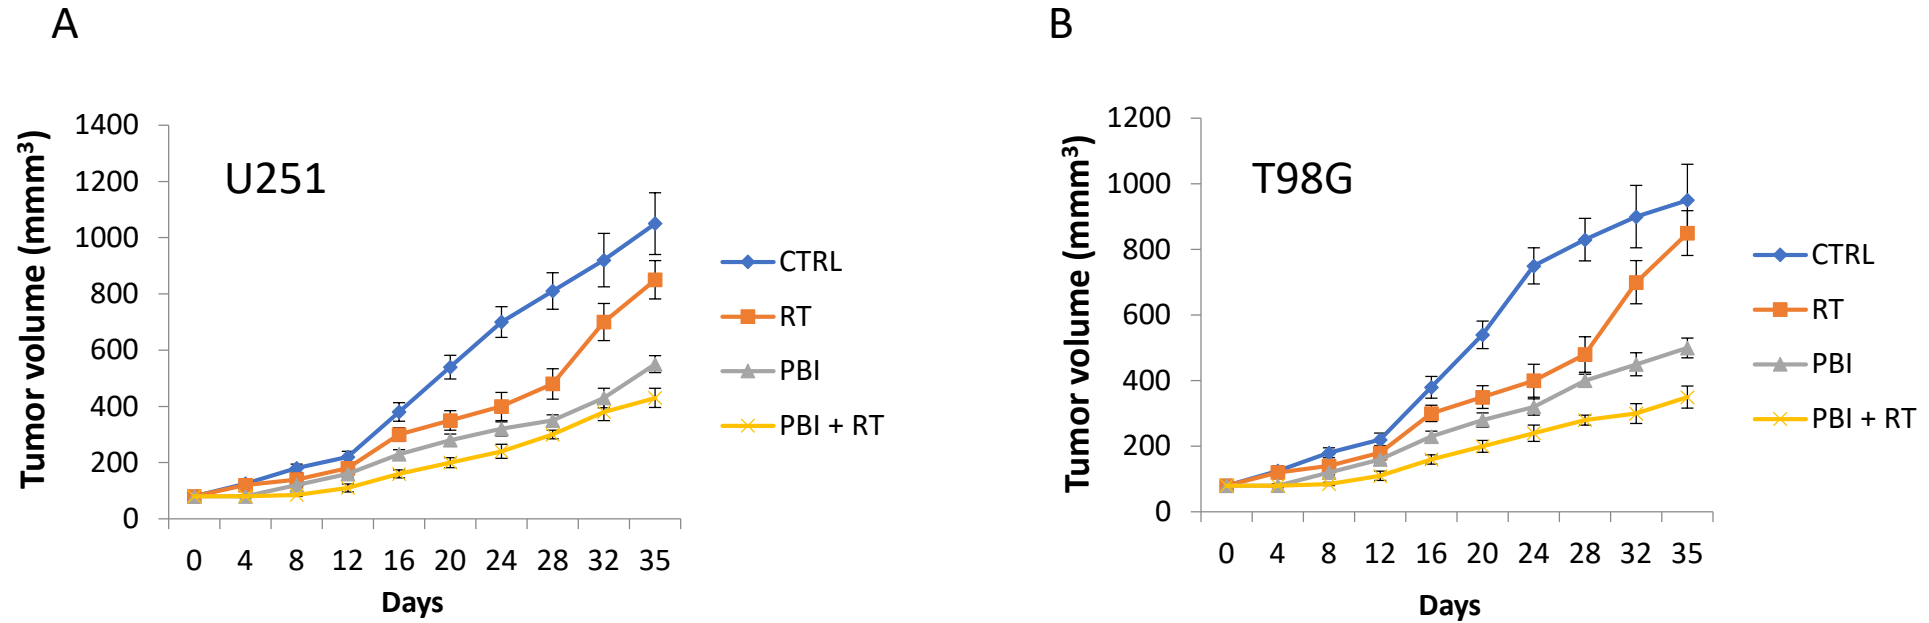

Figure S4. The tumor growth curve of U251 (A) and T98G (B) mouse xenografts after being treated with RT alone, PBI-05204 alone or RT plus PBI-05204. The detailed treatment schedule was described in M&M section. Data are presented as mean  $\pm$  SD.
